# Supplementary material for: Organic Mulches as an Alternative to Conventional Under-Vine Weed Management in Mediterranean Irrigated Vineyards
Source: MDPI journal article supplement (doi:10.3390/plants11202785), 2022-10-20
Supplement: s1 [file s1]

Table S1. Significance of the one-way ANOVA test for Trial 1. F and *p* values of each sampling date.

| Trial 1 |           |         |          |
|---------|-----------|---------|----------|
| Date    |           | F       | <i>p</i> |
| 2017    | March     | 4,728   | 0,0211   |
|         | May       | 3,208   | 0,0587   |
|         | July      | 2,714   | 0,0913   |
|         | September | 3,0892  | 0,0684   |
| 2018    | March     | 4,4285  | 0,0257   |
|         | May       | 2,9286  | 0,0766   |
|         | July      | 3,4361  | 0,0516   |
|         | September | 8,1981  | 0,0034   |
| 2019    | April     | 18,5049 | 0,0001   |

Table S2. Significance of the one-way ANOVA test for Trial 2. F and *p* values of each sampling date.

| Trial 2 |        |         |          |
|---------|--------|---------|----------|
| Date    |        | F       | <i>p</i> |
| 2017    | May    | 4,1589  | 0,0057   |
|         | July   | 12,5561 | <0,0001  |
|         | May    | 85,6948 | <0,0001  |
| 2018    | July   | 16,2971 | <0,0001  |
|         | August | 10,4635 | <0,0001  |
| 2019    | April  | 23,2979 | <0,0001  |
